# Supplementary material for: Fresh fruit consumption in relation to incident diabetes and diabetic vascular complications: A 7-y prospective study of 0.5 million Chinese adults
Source: PubMed Central journal article supplement (PMC5388466; doi:10.1371/journal.pmed.1002279), 2017-04-11
Supplement: pmed.1002279.s001.pdf [file pmed.1002279.s001.pdf]

**S1 Fig. Adjusted HRs for incident diabetes associated with 1 daily portion of fresh fruit in subgroups of participants without diabetes at baseline**

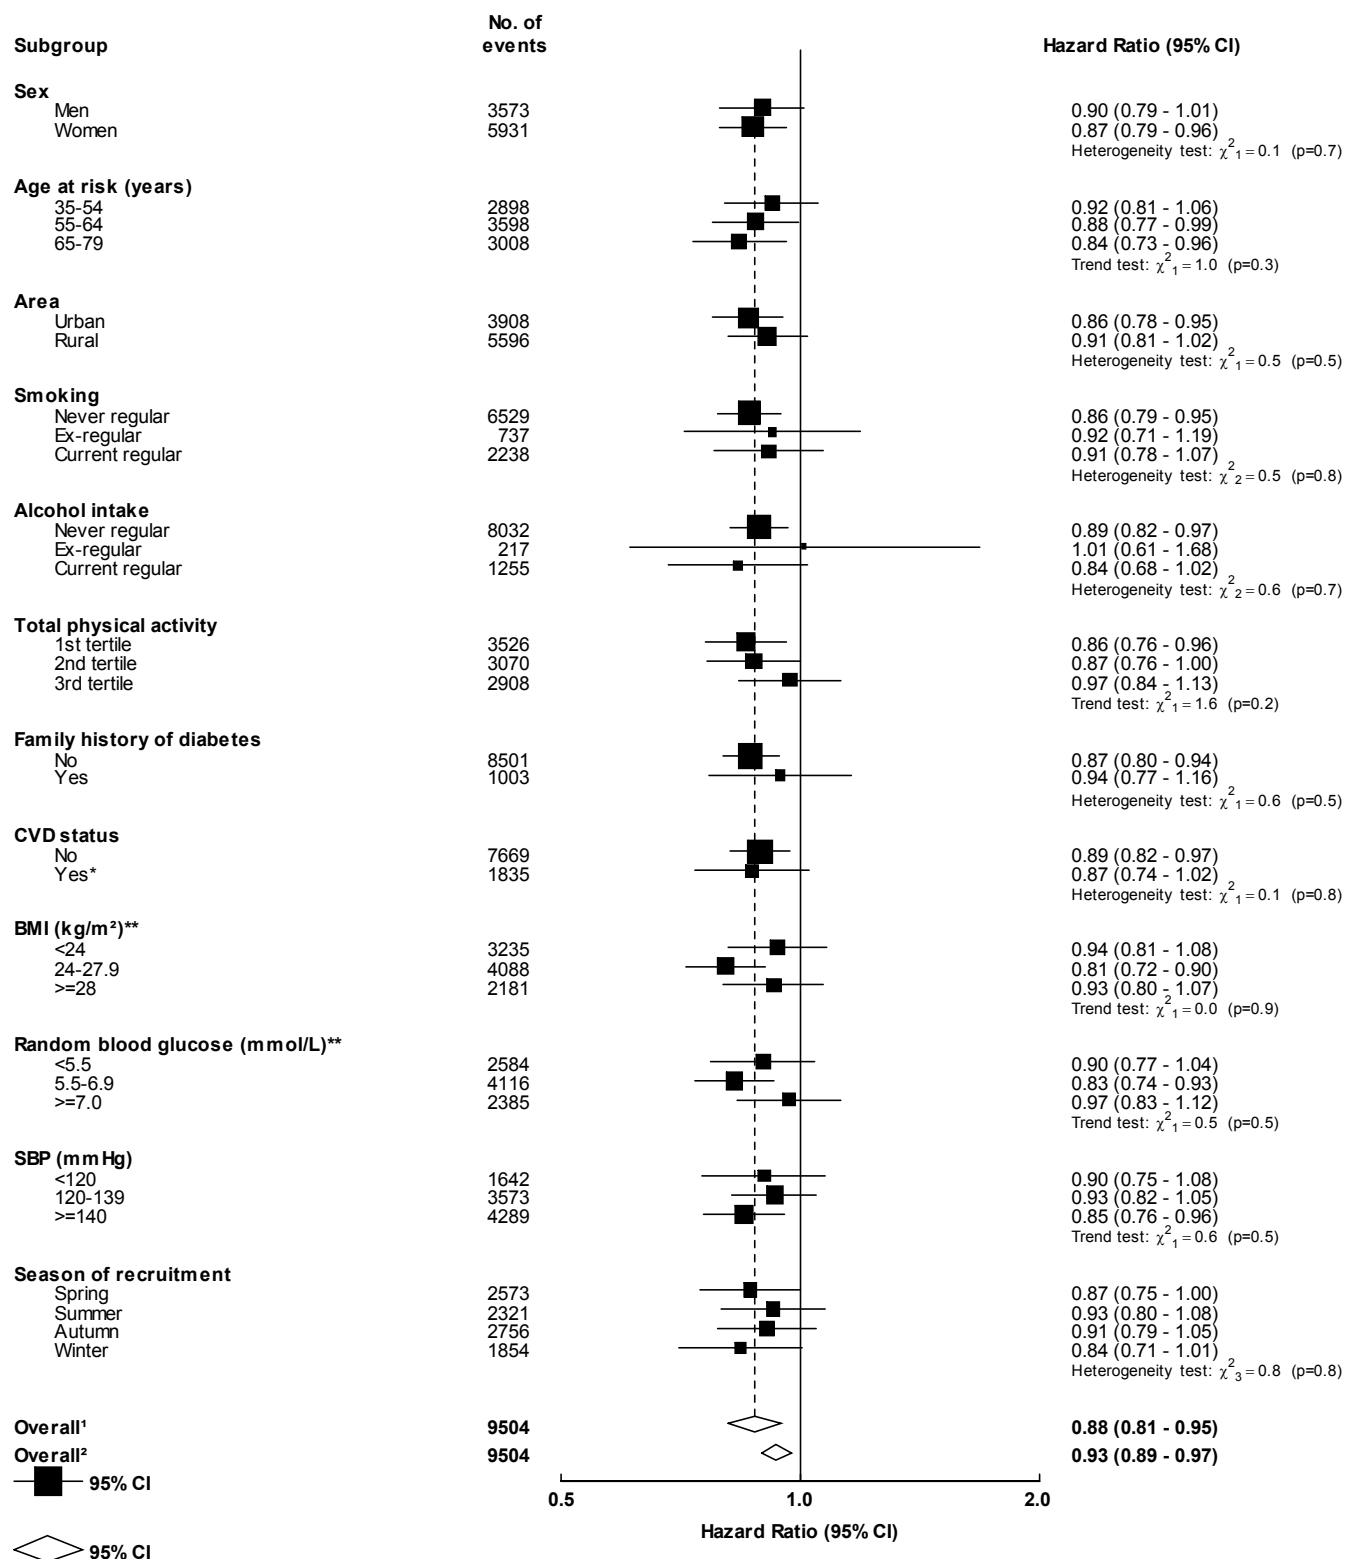

1. Overall effect of usual fresh fruit consumption after adjusting for regression dilution bias;
2. Overall effect of baseline fresh fruit consumption before adjusting for regression dilution bias.

\* Including participants with either prevalent or incident CVD;

\*\*8159 participants had missing values on blood glucose. 2 participants had missing values on BMI.
