# Supplementary material for: Fresh fruit consumption in relation to incident diabetes and diabetic vascular complications: A 7-y prospective study of 0.5 million Chinese adults
Source: PubMed Central journal article supplement (PMC5388466; doi:10.1371/journal.pmed.1002279), 2017-04-11
Supplement: pmed.1002279.s002.pdf [file pmed.1002279.s002.pdf]

**S2 Fig. Adjusted HRs for all-cause mortality and micro-and macro-vascular complications of diabetes associated with 1 daily portion of fresh fruit in subgroups of participants with diabetes at baseline**

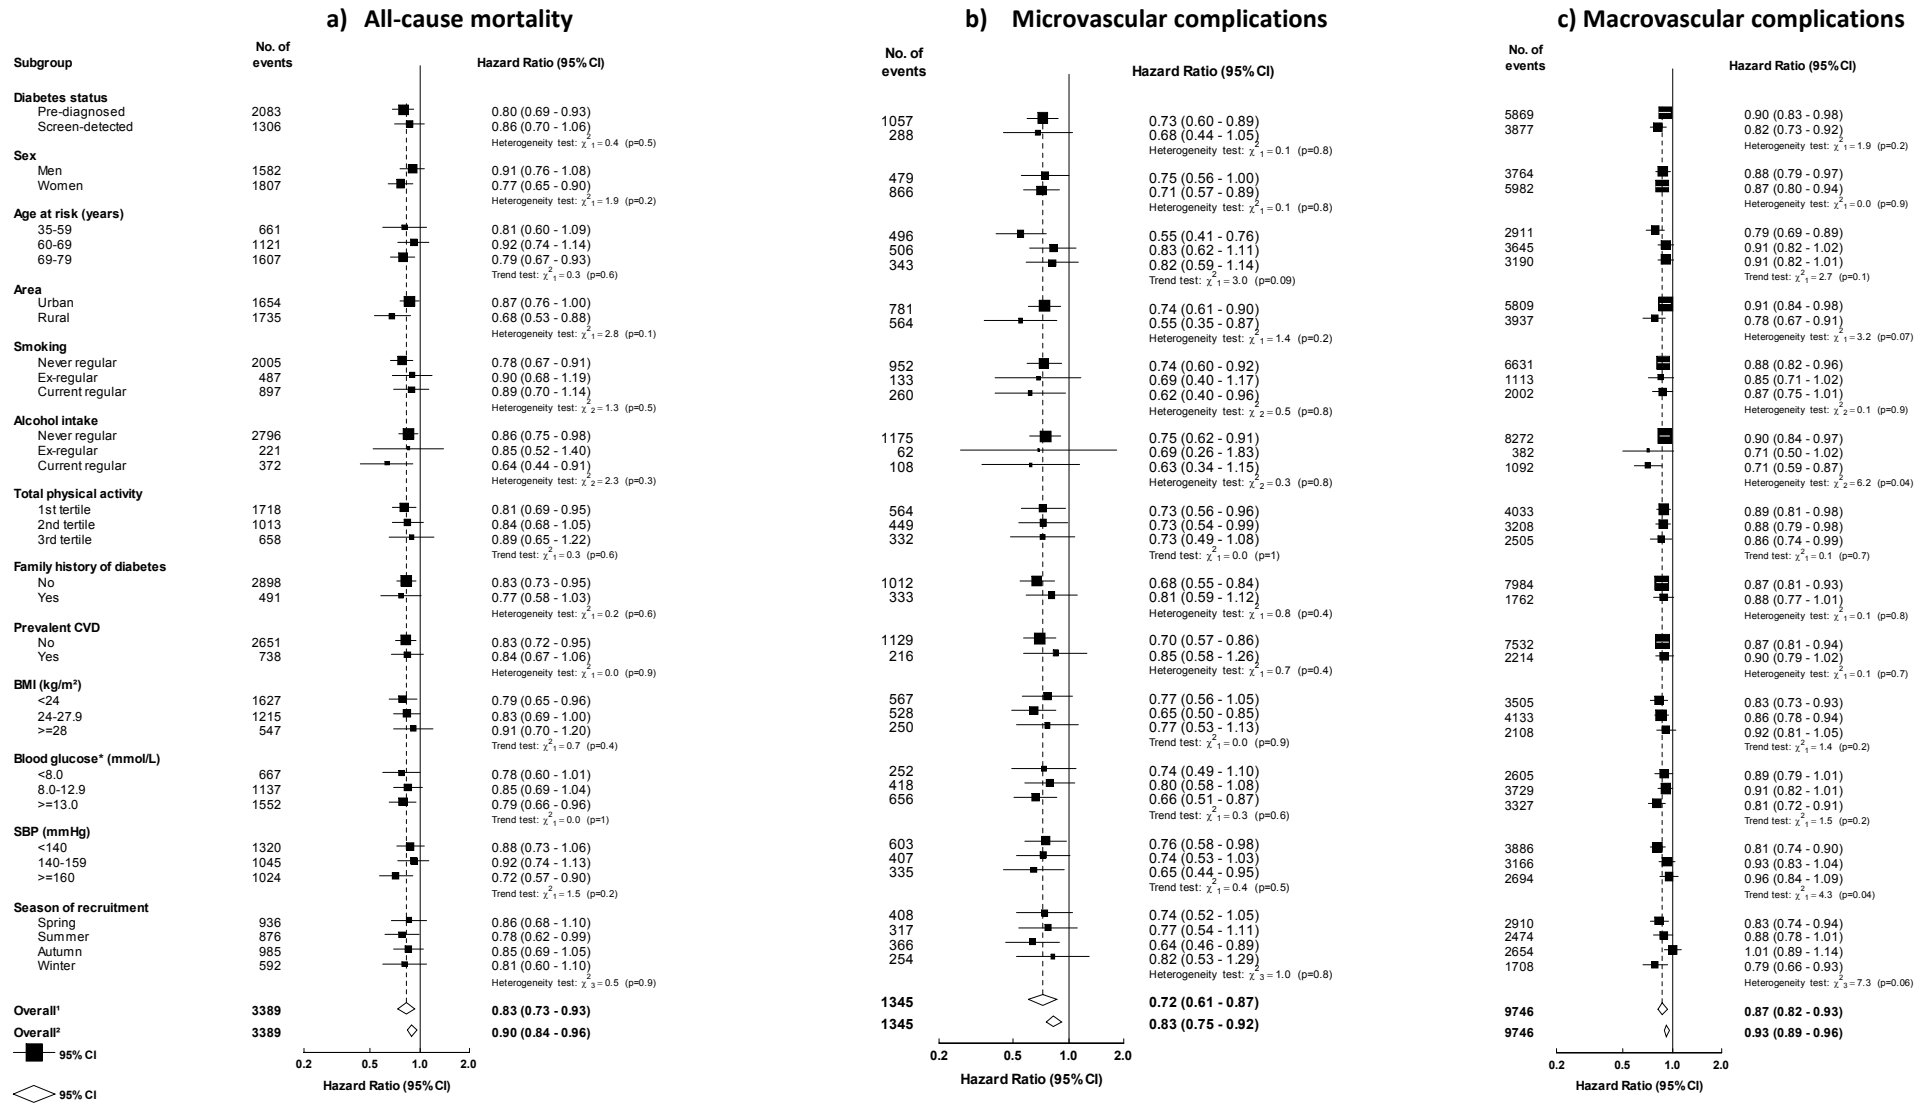

1. Overall effect of usual fresh fruit consumption after adjusting for regression dilution bias;  
 \* 182 participants had missing values on blood glucose.

2. Overall effect of baseline fresh fruit consumption before adjusting for regression dilution bias.
