# Supplementary material for: Fresh fruit consumption in relation to incident diabetes and diabetic vascular complications: A 7-y prospective study of 0.5 million Chinese adults
Source: PubMed Central journal article supplement (PMC5388466; doi:10.1371/journal.pmed.1002279), 2017-04-11
Supplement: pmed.1002279.s004.pdf [file pmed.1002279.s004.pdf]

**S1 Table. Baseline and usual portions per month for each baseline category of fruit consumption based on 19,788 participants who attended the first resurvey in 2008**

| Baseline          | 1 <sup>st</sup> resurvey (mean 2.6 years later) |                  |                  |                 |                  | Consumption days per month | Mean daily portion* | Baseline consumption (portions/month) | Usual consumption (portions/month)† |
|-------------------|-------------------------------------------------|------------------|------------------|-----------------|------------------|----------------------------|---------------------|---------------------------------------|-------------------------------------|
|                   | Never/rarely                                    | Monthly          | 1-3 days/wk      | 4-6 days/wk     | Daily            |                            |                     |                                       |                                     |
| n                 | 1                                               | 2                | 3                | 4               | 5                |                            |                     | <b>B</b>                              | <b>U</b>                            |
| 1<br>Never/rarely | 17.85 %<br>(244)                                | 55.74%<br>(762)  | 18.00%<br>(246)  | 4.24%<br>(58)   | 4.17%<br>(57)    | 0                          | -                   | B <sub>1</sub> = 0                    | U <sub>1</sub> = 7.47               |
| 2<br>Monthly      | 7.37%<br>(496)                                  | 52.07%<br>(3504) | 29.01%<br>(1952) | 6.85%<br>(461)  | 4.70%<br>(316)   | 2.5                        | 1.37                | B <sub>2</sub> = 3.4<br>(2.5×1.37)    | U <sub>2</sub> = 9.74               |
| 3<br>1-3 days/wk  | 4.00%<br>(250)                                  | 31.70%<br>(1981) | 37.43%<br>(2339) | 11.67%<br>(729) | 15.20%<br>(950)  | 8.6                        | 1.42                | B <sub>3</sub> = 12.2<br>(8.6×1.42)   | U <sub>3</sub> = 16.82              |
| 4<br>4-6 days/wk  | 1.59%<br>(29)                                   | 20.12%<br>(368)  | 35.05%<br>(641)  | 15.04%<br>(275) | 28.21%<br>(516)  | 21.5                       | 1.40                | B <sub>4</sub> = 30.1<br>(21.5×1.40)  | U <sub>4</sub> = 23.71              |
| 5<br>Daily        | 1.25%<br>(45)                                   | 6.81%<br>(246)   | 18.32%<br>(662)  | 13.17%<br>(476) | 60.46%<br>(2185) | 30                         | 1.68                | B <sub>5</sub> = 50.4<br>(30×1.68)    | U <sub>5</sub> = 36.90              |

\*The mean daily portion number came from the 2<sup>nd</sup> resurvey data, used as a proxy of baseline mean daily portion assuming that the daily portions of fresh fruit consumption did not vary much from the baseline to the 2<sup>nd</sup> resurvey (i.e. people may change their frequency of fruit consumption but the daily amount of fresh fruit consumption remains roughly the same).

†Usual intake amount for each group was estimated by taking into account changes in consumption frequency between baseline and 1st resurvey using this formula  $U_n = \sum_{i=1}^5 (F_{ni} \times B_i)$ ; F is the percentage in each cell, B is the baseline proportion per month for each baseline category, U is the usual proportion per month for each baseline category.
