# Supplementary material for: Fresh fruit consumption in relation to incident diabetes and diabetic vascular complications: A 7-y prospective study of 0.5 million Chinese adults
Source: PubMed Central journal article supplement (PMC5388466; doi:10.1371/journal.pmed.1002279), 2017-04-11
Supplement: pmed.1002279.s005.pdf [file pmed.1002279.s005.pdf]

**S2 Table: ICD-10 codes for study outcomes**

| <b>Outcomes</b>              | <b>ICD-10 codes</b>                                                                                          |
|------------------------------|--------------------------------------------------------------------------------------------------------------|
| Diabetes                     | E10-E14                                                                                                      |
| Total cardiovascular disease | I00-I25, I27-I88, and I95-I99                                                                                |
| Ischemic heart disease       | I20-I25                                                                                                      |
| Stroke                       | I60, I61, I63 and I64                                                                                        |
| Other macrovascular diseases | I00-I19, I27-I59, I62, I65-I88, I95-I99, E10.5, E11.5, E12.5, E13.5 and E14.5                                |
| Diabetic nephropathy         | E10.2, E11.2, E12.2, E13.2, and E14.2                                                                        |
| Diabetic retinopathy         | E10.3, E11.3, E12.3, E13.3 and E14.3, but excluding diabetic cataract, diabetic glaucoma and diabetic iritis |
| Diabetic neuropathy          | E10.4, E11.4, E12.4, E13.4, and E14.4                                                                        |
