# Supplementary material for: Fresh fruit consumption in relation to incident diabetes and diabetic vascular complications: A 7-y prospective study of 0.5 million Chinese adults
Source: PubMed Central journal article supplement (PMC5388466; doi:10.1371/journal.pmed.1002279), 2017-04-11
Supplement: pmed.1002279.s006.pdf [file pmed.1002279.s006.pdf]

**S3 Table. Baseline characteristics of participants by frequencies of fresh fruit consumption at baseline (n=512,891)**

|                                           | Consumption frequency of fresh fruit |                      |                          |                         |                   |
|-------------------------------------------|--------------------------------------|----------------------|--------------------------|-------------------------|-------------------|
|                                           | Never/rarely<br>(32,775)             | Monthly<br>(174,195) | 1-3 days/wk<br>(161,353) | 4-6 days/wk<br>(47,982) | Daily<br>(96,586) |
| <b>Mean age (SD), years</b>               | 54.7 (10.7)                          | 52.7 (11.2)          | 50.9 (10.6)              | 49.9 (10.6)             | 50.3 (11.9)       |
| <b>Women, %</b>                           | 48.0                                 | 55.8                 | 56.7                     | 61.9                    | 71.0              |
| <b>Urban resident, %</b>                  | 31.1                                 | 22.2                 | 43.2                     | 54.6                    | 84.3              |
| <b>Highest education, %</b>               |                                      |                      |                          |                         |                   |
| No formal education                       | 29.0                                 | 23.4                 | 18.1                     | 14.3                    | 9.2               |
| Primary school                            | 34.2                                 | 35.1                 | 33.1                     | 29.9                    | 26.1              |
| Middle school or higher                   | 36.8                                 | 41.5                 | 48.8                     | 55.8                    | 64.7              |
| <b>Household income, %</b>                |                                      |                      |                          |                         |                   |
| Low                                       | 44.5                                 | 36.0                 | 27.3                     | 18.2                    | 15.3              |
| Moderate                                  | 26.7                                 | 28.9                 | 31.3                     | 30.6                    | 25.6              |
| High                                      | 28.8                                 | 35.1                 | 41.4                     | 51.2                    | 59.1              |
| <b>Smoking, %</b>                         |                                      |                      |                          |                         |                   |
| Non smokers                               | 55.5                                 | 63.1                 | 68.9                     | 73.5                    | 74.8              |
| Ex-smokers                                | 4.8                                  | 5.2                  | 6.1                      | 6.7                     | 7.1               |
| Current smokers                           | 39.7                                 | 31.7                 | 25.0                     | 19.8                    | 18.1              |
| <b>Alcohol drinking, %</b>                |                                      |                      |                          |                         |                   |
| Non drinkers                              | 76.9                                 | 81.9                 | 84.1                     | 86.0                    | 85.7              |
| Ex-drinkers                               | 2.1                                  | 1.7                  | 1.7                      | 1.9                     | 2.0               |
| Current drinkers                          | 21.0                                 | 16.4                 | 14.2                     | 12.1                    | 12.3              |
| <b>Physical activity (SD), MET-hr/day</b> | 20.8 (12.7)                          | 21.6 (12.7)          | 21.2 (12.0)              | 20.6 (12.0)             | 20.3 (13.4)       |
| <b>BMI (SD), kg/m<sup>2</sup>†</b>        | 23.3 (3.3)                           | 23.5 (3.5)           | 23.8 (3.3)               | 23.9 (3.3)              | 23.9 (3.7)        |
| <b>SBP (SD), mmHg</b>                     | 133.2 (20.0)                         | 131.7 (21.0)         | 131.3 (19.8)             | 130.4 (19.9)            | 129.3 (22.2)      |
| <b>Regular food consumption*, %</b>       |                                      |                      |                          |                         |                   |
| Meat                                      | 39.0                                 | 39.1                 | 47.2                     | 57.9                    | 59.0              |
| Dairy products                            | 7.8                                  | 6.1                  | 9.3                      | 16.6                    | 25.8              |
| Preserved vegetables                      | 27.4                                 | 21.8                 | 21.7                     | 24.2                    | 23.1              |
| Fresh vegetables                          | 93.0                                 | 91.2                 | 95.9                     | 97.6                    | 98.5              |
| <b>Random blood glucose (SD), mmol/L†</b> | 6.5 (2.3)                            | 6.1 (2.4)            | 6.0 (2.3)                | 6.0 (2.3)               | 5.9 (2.6)         |
| <b>Baseline diabetes status</b>           |                                      |                      |                          |                         |                   |
| Previously diagnosed diabetes             | 9.4                                  | 3.4                  | 2.7                      | 2.1                     | 1.9               |
| Screen-detected diabetes                  | 2.8                                  | 2.9                  | 2.8                      | 2.8                     | 2.5               |

Values were adjusted for age, sex, and study area where appropriate.

\*Regular consumption means consuming food products for at least 4 days per week, except for fresh vegetables, which means daily consumption;

† Level of random blood glucose was missing for 8341 participants. BMI was missing for 2 participants.
