# Supplementary material for: Fresh fruit consumption in relation to incident diabetes and diabetic vascular complications: A 7-y prospective study of 0.5 million Chinese adults
Source: PubMed Central journal article supplement (PMC5388466; doi:10.1371/journal.pmed.1002279), 2017-04-11
Supplement: pmed.1002279.s007.pdf [file pmed.1002279.s007.pdf]

**S4 Table. Characteristics of participants with previously diagnosed diabetes at baseline (n = 16,162)**

|                                                | Consumption frequency of fresh fruit |                     |                          |                         |                   | Overall<br>(n=16,162) |
|------------------------------------------------|--------------------------------------|---------------------|--------------------------|-------------------------|-------------------|-----------------------|
|                                                | Never/rarely<br>(n=2893)             | Monthly<br>(n=4553) | 1-3 days/wk<br>(n=4327 ) | 4-6 days/wk<br>(n=1106) | Daily<br>(n=3283) |                       |
| <b>Age, sex and region-adjusted</b>            |                                      |                     |                          |                         |                   |                       |
| BMI (SD), kg/m <sup>2</sup>                    | 24.8 (3.4)                           | 24.8 (3.5)          | 25.0 (3.4)               | 25.2 (3.4)              | 25.1 (3.5)        | 24.9 (3.5)            |
| SBP (SD), mmHg                                 | 142.7 (22.2)                         | 142.8 (22.5)        | 141.5 (21.8)             | 141.1 (21.9)            | 140.5 (22.8)      | 141.8 (22.5)          |
| Random blood glucose (SD), mmol/L*             | 11.7 (5.7)                           | 11.5 (5.8)          | 11.3 (5.6)               | 11.0 (5.6)              | 11.1 (5.9)        | 11.4 (5.7)            |
| Anti-diabetic treatment, %                     | 90.0                                 | 84.6                | 83.1                     | 80.9                    | 83.3              | 84.6                  |
| Type of treatment, %                           |                                      |                     |                          |                         |                   |                       |
| Oral anti-diabetic drug <sup>†</sup>           | 62.5                                 | 61.0                | 63.7                     | 64.7                    | 61.6              | 62.4                  |
| Insulin                                        | 16.7                                 | 15.0                | 13.2                     | 11.6                    | 14.3              | 14.5                  |
| Other treatment                                | 20.8                                 | 24.0                | 23.1                     | 23.6                    | 24.1              | 23.1                  |
| Age of diabetes onset (SD), years <sup>‡</sup> | 53.2 (5.4)                           | 53.3 (5.5)          | 53.5 (5.4)               | 53.5 (5.4)              | 53.6 (5.6)        | 53.4 (9.3)            |
| Diabetes duration (SD), years <sup>‡</sup>     | 5.9 (5.3)                            | 5.8 (5.3)           | 5.6 (5.2)                | 5.6 (5.2)               | 5.6 (5.4)         | 5.7 (5.3)             |
| <b>Fully adjusted<sup>¶</sup></b>              |                                      |                     |                          |                         |                   |                       |
| BMI (SD), kg/m <sup>2</sup>                    | 24.8 (3.5)                           | 24.8 (3.5)          | 25.0 (3.4)               | 25.1 (3.4)              | 25.1 (3.6)        | 24.9 (3.5)            |
| SBP (SD), mmHg                                 | 142.3 (22.2)                         | 142.4 (22.3)        | 141.6 (21.4)             | 141.6 (21.5)            | 141.0 (22.9)      | 141.8 (22.5)          |
| Random blood glucose (SD), mmol/L*             | 11.6 (5.5)                           | 11.5 (5.6)          | 11.3 (5.3)               | 11.2 (5.4)              | 11.2 (5.8)        | 11.4 (5.7)            |

Values are either percentage or mean (SD)

\* Level of random blood glucose was missing for 181 participants.

<sup>†</sup> Use of either chlorpropamide or metformin

<sup>‡</sup> was missing for 21 participants.

<sup>¶</sup> Adjusted for age, sex, region, study area, education, annual household income, smoking, alcohol intake, physical activity, consumption of meat, dairy products and preserved vegetables, survey season, family history of diabetes, anti-diabetic treatment, and, for blood glucose only, and fasting time.
