# Supplementary material for: Fresh fruit consumption in relation to incident diabetes and diabetic vascular complications: A 7-y prospective study of 0.5 million Chinese adults
Source: PubMed Central journal article supplement (PMC5388466; doi:10.1371/journal.pmed.1002279), 2017-04-11
Supplement: pmed.1002279.s008.pdf [file pmed.1002279.s008.pdf]

**S5 Table. HRs and 95% CIs (top vs bottom categories) from sensitivity analyses.**

|                                                   | Among those without diabetes at baseline<br>(n = 482,591) |                  | Among those with diabetes at baseline<br>(n = 30,300) |                             |
|---------------------------------------------------|-----------------------------------------------------------|------------------|-------------------------------------------------------|-----------------------------|
|                                                   | Diabetes incidence                                        | Total mortality  | Microvascular complications                           | Macrovascular complications |
| Exclude first 2 years of follow-up                | 0.91 (0.95-0.96)                                          | 0.85 (0.77-0.93) | 0.77 (0.67-0.88)                                      | 0.94 (0.89-0.99)            |
| Exclude prevalent CVD cases                       | 0.89 (0.83-0.94)                                          | 0.86 (0.78-0.94) | 0.73 (0.63-0.83)                                      | 0.90 (0.85-0.94)            |
| Exclude incident myocardial infarction and stroke | 0.88 (0.83-0.94)                                          | -                | -                                                     | -                           |
| + Rice                                            | 0.87 (0.83-0.93)                                          | 0.87 (0.80-0.94) | 0.75 (0.66-0.84)                                      | 0.90 (0.86-0.94)            |
| + Wheat                                           | 0.88 (0.83-0.94)                                          | 0.87 (0.80-0.94) | 0.75 (0.67-0.85)                                      | 0.90 (0.87-0.94)            |
| + Other staple foods                              | 0.89 (0.84-0.94)                                          | 0.87 (0.80-0.94) | 0.74 (0.66-0.84)                                      | 0.90 (0.86-0.94)            |
| + Fresh vegetables                                | 0.87 (0.82-0.93)                                          | 0.86 (0.80-0.94) | 0.74 (0.66-0.84)                                      | 0.90 (0.86-0.94)            |
| + Poultry                                         | 0.87 (0.82-0.93)                                          | 0.87 (0.81-0.95) | 0.74 (0.66-0.84)                                      | 0.91 (0.87-0.94)            |
| + Fish                                            | 0.87 (0.82-0.92)                                          | 0.88 (0.81-0.95) | 0.74 (0.66-0.84)                                      | 0.91 (0.87-0.94)            |
| + Eggs                                            | 0.87 (0.83-0.93)                                          | 0.87 (0.80-0.94) | 0.74 (0.66-0.84)                                      | 0.91 (0.87-0.95)            |
| + Soybean                                         | 0.87 (0.82-0.92)                                          | 0.87 (0.80-0.94) | 0.75 (0.66-0.84)                                      | 0.90 (0.86-0.94)            |
| + Spicy food                                      | 0.88 (0.83-0.93)                                          | 0.87 (0.80-0.94) | 0.75 (0.66-0.84)                                      | 0.90 (0.86-0.94)            |
| + Tea consumption                                 | 0.88 (0.83-0.93)                                          | 0.87 (0.80-0.94) | 0.74 (0.66-0.84)                                      | 0.90 (0.86-0.94)            |

\*For the analyses on diabetes incidence, both baseline prevalent and incident CVD were excluded; but for the analyses on diabetes complications, only prevalent CVD cases were excluded from the analyses.
